# Supplementary material
Source: PubMed Central journal article supplement (PMC5949145)
Supplement: NIHMS928814-supplement-Supp_info.pdf [file NIHMS928814-supplement-Supp_info.pdf]

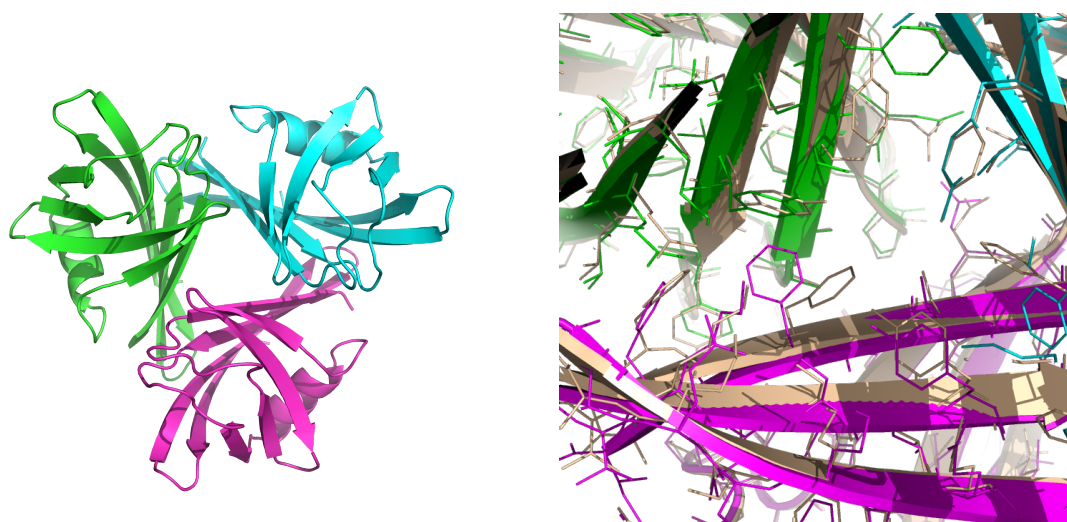

Figure S1: On the left, trimeric assembly of target T0867o, a viral fibre head with close sequence and structural templates. On the right, superposition of the top scoring prediction (0.92 ICS and 0.95 IPS), second model by BAKER-ROSETTASERVER (beige), onto the target. Despite some differences in side chain orientation, the backbone conformation and interface are predicted with high accuracy to the experimental structure.

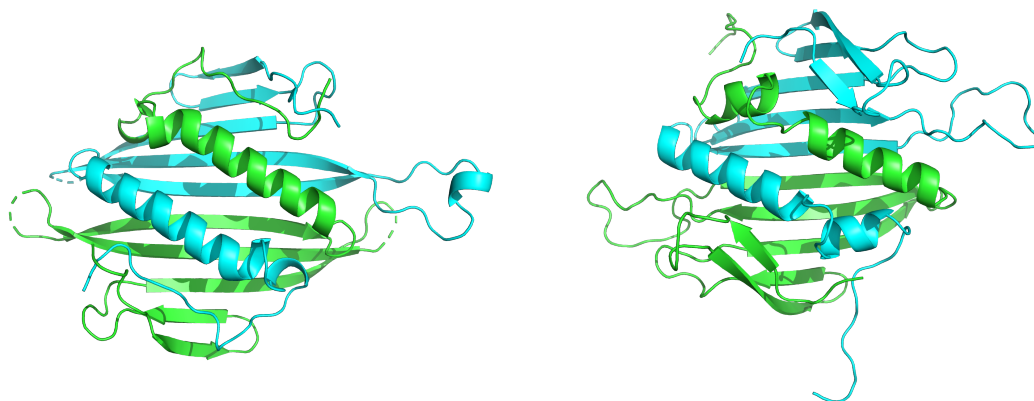

Figure S2: AP205 (T0929) is a viral coat protein with 180 subunits in the biological assembly. The experimental structure by solid-state NMR only contained a dimeric interface (left), which is significantly stronger than the others, so it was released as a dimer for prediction. Structural templates for the dimer were available during the prediction period, but they were not detectable using sequence comparison methods. The human group TSlab-assembly was able to reproduce the protein fold and dimeric assembly correctly (right), although a threading error led to poor monomeric and interface contact scores.

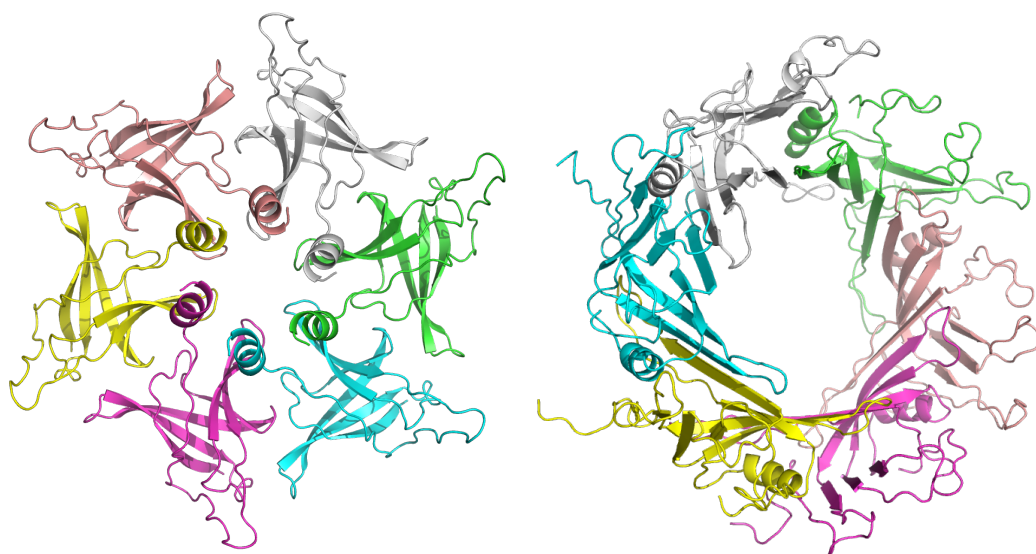

Figure S3: Biological assembly of oligomeric target T0866o (left) and first model by TSlab-assembly (right). Although the model correctly reproduces the symmetry of the target, both the tertiary structure of the monomers and the mode of association are incorrect. While the target forms the assembly through a central swapped helical interaction, the model contains beta-pairings with a central hole.

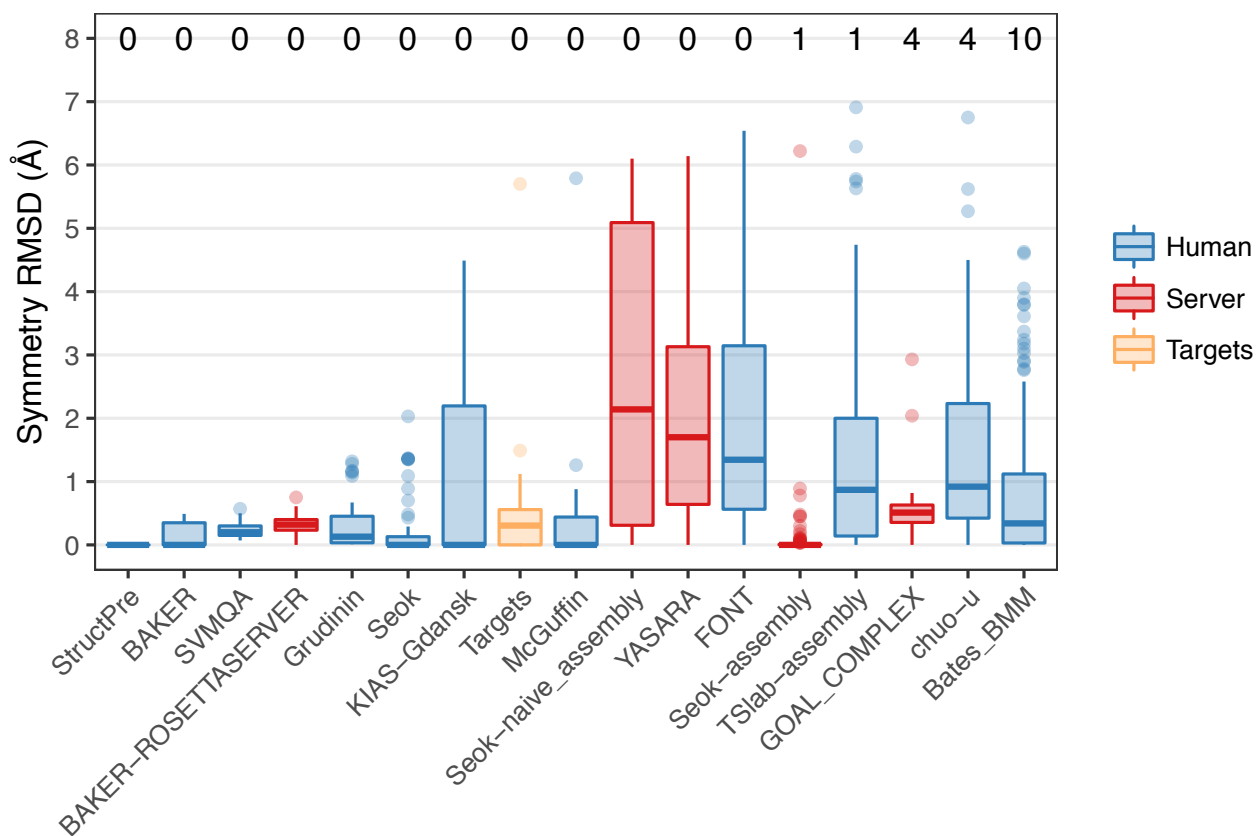

Figure S4: Distribution of symmetry RMSD for all oligomeric models of the symmetric targets submitted by each group. Number of asymmetric models is shown at the top. Groups are sorted increasingly by the number of asymmetric models, first, and by the median of the symmetry RMSD, second. The distribution of symmetry RMSD of the target experimental structures is shown for comparison.

Table S1: Sequence templates for the oligomeric target assemblies used to compute the baseline performance. The QS-score of each template to their corresponding target assembly is shown.

| <b>Target</b>        | <b>Difficulty</b> | <b>Template</b> | <b>QS-Score</b> |
|----------------------|-------------------|-----------------|-----------------|
| T0860o               | Easy              | 3ZPE            | 0.41            |
| T0861o-T0862o-T0870o | Medium            | 1Y7L            | 0.29            |
| T0867o               | Easy              | 4UMI            | 0.70            |
| T0873o               | Medium            | 4IP2            | 0.32            |
| T0880o               | Medium            |                 | 0.00            |
| T0881o               | Easy              | 2VTW            | 0.34            |
| T0888o               | Medium            |                 | 0.00            |
| T0889o               | Easy              | 4ZA2            | 0.40            |
| T0893o               | Easy              | 4I5S            | 0.04            |
| T0903o-T0904o        | Medium            | 4A1S            | 0.16            |
| T0906o               | Easy              | 3R1M            | 0.73            |
| T0909o               | Easy              | 2INU            | 0.02            |
| T0917o               | Easy              | 3BFJ            | 0.10            |
| T0921-T0922          | Easy              | 2CCL            | 0.02            |
| T0931o               | Medium            | 3OAO            | 0.39            |

Table S2: Symmetry of the target assemblies in CASP12. The macromolecular size (Size), chains of the experimental structure in the assembly (Chains), stoichiometry (Stoich.), symmetry (Symm.) and the symmetry RMSD and TM-score deviations are shown. There are no asymmetric assemblies, except for the heterodimers, and targets range from perfect symmetry to about 1.5Å RMSD.

| Target               | Size | Chains          | Stoich. | Symm. | RMSD | TM-Sc. |
|----------------------|------|-----------------|---------|-------|------|--------|
| T0860o               | 3    | C A B           | A3      | C3    | 0.00 | 1.00   |
| T0866o               | 6    | A F E D C B     | A6      | C6    | 0.30 | 0.99   |
| T0867o               | 3    | A B C           | A3      | C3    | 0.44 | 0.99   |
| T0875o               | 2    | A B             | A2      | C2    | 1.12 | 0.94   |
| T0880o               | 3    | A C B           | A3      | C3    | 0.83 | 0.98   |
| T0881o               | 3    | A C B           | A3      | C3    | 0.49 | 0.99   |
| T0873o               | 4    | A D C B         | A4      | D2    | 0.00 | 1.00   |
| T0888o               | 3    | A C B           | A3      | C3    | 0.31 | 0.99   |
| T0884-T0885          | 2    | A B             | AB      | C1    | 0.00 | 1.00   |
| T0868-T0869          | 2    | A B             | AB      | C1    | 0.00 | 1.00   |
| T0893o               | 2    | A B             | A2      | C2    | 0.00 | 1.00   |
| T0889o               | 4    | A D C B         | A4      | D2    | 0.00 | 1.00   |
| T0894-T0895          | 2    | A B             | AB      | C1    | 0.00 | 1.00   |
| T0861o-T0862o-T0870o | 6    | A C B D E F     | A2B2C2  | C2    | 0.34 | 0.99   |
| T0909o               | 3    | A C B           | A3      | C3    | 0.30 | 1.00   |
| T0912o               | 2    | A B             | A2      | C2    | 0.23 | 1.00   |
| T0906o               | 8    | A B H D C G F E | A8      | D4    | 0.88 | 0.99   |
| T0913o               | 6    | A F E D C B     | A6      | D3    | 0.00 | 1.00   |
| T0917o               | 2    | A B             | A2      | C2    | 0.00 | 1.00   |
| T0897-T0898          | 2    | A B             | AB      | C1    | 0.00 | 1.00   |
| T0929o               | 2    | A B             | A2      | C2    | 0.58 | 0.98   |
| T0921-T0922          | 2    | A B             | AB      | C1    | 0.00 | 1.00   |
| T0930o               | 2    | A B             | A2      | C2    | 0.15 | 1.00   |
| T0931o               | 2    | A B             | A2      | C2    | 0.55 | 0.99   |
| T0932o               | 2    | A B             | A2      | C2    | 1.49 | 0.94   |
| T0934o               | 2    | A B             | A2      | C2    | 0.39 | 1.00   |
| T0933o               | 6    | A F E D C B     | A6      | C6    | 0.00 | 1.00   |
| T0945o               | 2    | A B             | A2      | C2    | 0.00 | 1.00   |
| T0914-T0915          | 2    | A B             | AB      | C1    | 0.00 | 1.00   |
| T0903o-T0904o        | 4    | B H R L         | A2B2    | C2    | 5.70 | 0.68   |
